# Supplementary material for: Outbreak of Porcine Epidemic Diarrhea in Suckling Piglets, China
Source: PubMed Central journal article supplement (PMC3381683; doi:10.3201/eid1801.111259), 2012-01
Supplement: 11-1259-Techapp_2p.pdf [file 11-1259-Techapp_2p.pdf]

# Outbreak of Porcine Epidemic Diarrhea in Suckling Piglets, China

## Technical Appendix

Table 1. Current farms status in this study, China

| Farm | No. sows | Vaccination* | Illness rate ,%/y | Mortality rate. % |
|------|----------|--------------|-------------------|-------------------|
| YL   | 1,000    | Yes          | 90                | 50                |
| HS   | 1,400    | No           | 100               | 80                |
| CY   | 300      | Yes          | 80                | 90                |
| SW   | 1,000    | Yes          | 80                | 100               |
| DY   | 2,000    | Yes          | 95                | 100               |
| JL   | 80       | No           | 75                | 80                |
| ZJ   | 90       | No           | 100               | 90                |
| MZ   | 100      | No           | 60                | 100               |

\*Sows were vaccinated with divalent inactivated transmissible gastroenteritis (TGE) and porcine epidemic diarrhea (PED) vaccine before delivery.

Table 2. Accession numbers, district, and collection date of the sequences used\*

| Accession no. | District                | Strain    | Collection date |
|---------------|-------------------------|-----------|-----------------|
| -             | Shen-Zhen, Guangdong    | JL        | 2010 Nov        |
| -             | Da-Yang, Guangdong      | DY        | 2010 Dec        |
| -             | Qing-Yuan, Guangdong    | YH        | 2011 Feb        |
| -             | Qing-Yuan, Guangdong    | YL        | 2011 Mar        |
| -             | Shi-Wan, Guangdong      | SW        | 2011 Apr        |
| -             | Bo-Luo, Guangdong       | CY        | 2011 May        |
| -             | He-Shan, Guangdong      | HS        | 2011 May        |
| -             | Mei-Zhou, Guangdong     | MZ        | 2011 Jun        |
| -             | Zhan-Jiang, Guangdong   | ZJ        | 2011 Jul        |
| FJ196196.1    | Nakornpathom (Thailand) | 07NP01    | 2007 Dec        |
| FJ196201.1    | Chonburi (Thailand)     | 08CB05    | 2008 Mar        |
| FJ196205.1    | Nakornpathom (Thailand) | 08NP03    | 2008 Jan        |
| FJ196206.1    | Nakornpathom (Thailand) | 08NP04    | 2008 Jan        |
| FJ196209.1    | Nakornpathom (Thailand) | 08NP07    | 2008 Mar        |
| FJ196214.1    | Ratchaburi (Thailand)   | 08RB02    | 2008 Jan        |
| FJ196215.1    | Ratchaburi (Thailand)   | 08RB03    | 2008 Jan        |
| FJ196221.1    | Chonburi (Thailand)     | KU01CB08  | 2008 Mar        |
| FJ196228.1    | Ratchaburi (Thailand)   | KU08RB08  | 2008 Mar        |
| AY653204.1    | Nan-Jing (China)        | JS-2004-2 | 2004 Jul        |
| EU031893.1    | Gan-Su (China)          | DX        | 2007 Aug        |
| AF298212.1    | South Korea             | -         | 2002 Aug        |
| AF500215.1    | South Korea             | -         | 2002 Apr        |
| AY167585.1    | South Korea             | Chinju99  | 2002 Oct        |
| EF185992.1    | Lan-Zhou (China)        | LZC       | 2006 Dec        |
| AB548624.1    | Japan                   | MK        | 2010 Mar        |
| DQ985739.1    | Hei-Long-Jiang (China)  | LJB/03    | 2006 Sep        |
| AF353511.1    | China                   | CV777     | 2001 Feb        |

\*-, sequences obtained from present outbreak have no accession no.

Table 3. Detection of PEDV-affected piglets and sows samples by RT-PCR, China\*

| Farm | Feces and intestine (no. positive/total) | Milk (no. positive/total) |
|------|------------------------------------------|---------------------------|
| YL   | 10/10                                    | 4/10                      |
| HS   | 24/24                                    | 4/6                       |
| CY   | 8/14                                     | 2/6                       |
| SW   | 4/6                                      | 1/5                       |
| DY   | 26/30                                    | 5/12                      |
| JL   | 3/6                                      | –                         |
| ZJ   | 16/22                                    | –                         |
| MZ   | 4/6                                      | –                         |

\*PEDV, porcine epidemic diarrhea virus; –, no corresponding samples.

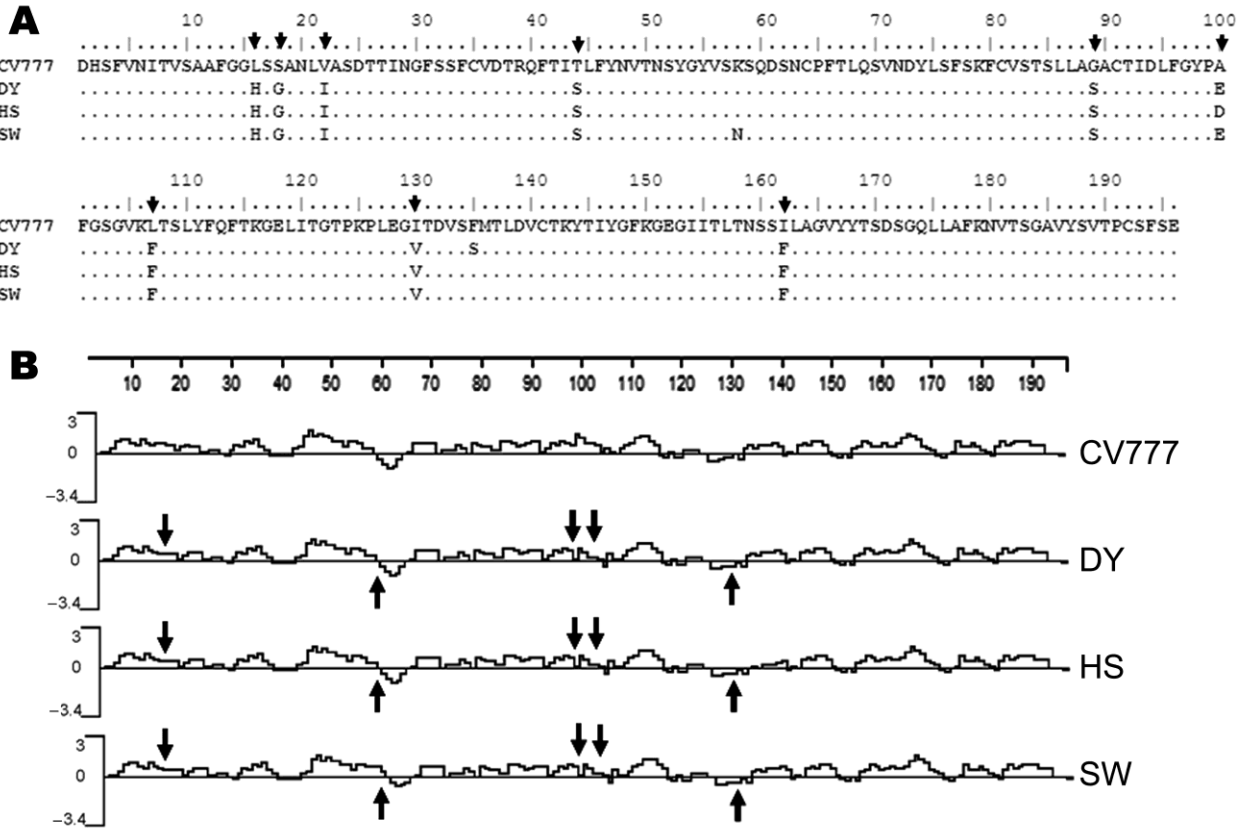

Figure. A) Deduced amino acid sequence comparison of the spike (S) proteins between these isolates from China (DY, HS and SW) and the reference CV777 strain. Only the amino acids different from those in the consensus sequence are indicated. B) Hydrophobicity plots of S generated by the Kyte and Doolittle method by using DNASTAR program ([www.dnastar.com](http://www.dnastar.com)). Major areas of difference are indicated by arrows.
